# Supplementary material
Source: PubMed Central journal article supplement (PMC3444262)

# Transcriptional analysis of apple fruit proanthocyanidin biosynthesis

Rebecca A. Henry-Kirk, Tony K. McGhie, Christelle M. Andre, Roger P. Hellens

Andrew C. Allan

## Supplementary Material

**Table S1: Forward and Reverse primers for apple genes used in qPCR analysis**

| Gene Identifier | Gene Name | Forward Primer 5' – 3'      | Reverse Primer 5' – 3'    |
|-----------------|-----------|-----------------------------|---------------------------|
| ES790093        | MdPAL     | CGAGGAGTGTGACAAGGTGTTCCA    | AGGAATGCAGCATGTAAACCGTGAC |
| EB135197        | MdC4H     | GGACGTTTAGTCCAGAACTTCGAGCT  | ACTTCATCACAATGGTGAATGCTTC |
| EB122629        | Md4CL     | CATAAACAGTGTCCCCAAGTCAGCAT  | AGTGTTCTACAAGCCTTCCCGATAA |
| CN944824        | MdCHS     | GGAGACAACTGGAGAAGGACTGGAA   | CGACATTGATACTGGTGTCTTCA   |
| CN946541        | MdCHI     | GGGATAACCTCGCGGCCAAA        | GCATCCATGCCGGAAGCTACAA    |
| CN491664        | MdF3H     | TGGAAGCTTGTGAGGACTGGGGT     | CTCCTCCGATGGCAAATCAAAGA   |
| AF117268        | MdDFR     | GATAGGGTTTGAGTTCAAGTA       | TCTCCTCAGCAGCCTCAGTTTTCT  |
| AF117269        | MdANS     | TCTCCTCAGCAGCCTCAGTTTTCT    | CAAAGCAGGCGGACAGGAGTAGC   |
| EB137300        | MdFLS     | TCAGATGGAGATAATGAGCAATGGAAA | ATTAACGGGGTTCACAAGCTGTGG  |
| AY830131        | MdLAR1    | TTGCAGTGGAAGGGCCTCATG       | TGATCCTCCTCCTTTGCAGTAGCT  |
| AY830132        | MdLAR2    | GATGTCAGGTGAATTTGCAGTGGGA   | TGGAGACGTTCTCCTCATGCACT   |
| EB125405        | MdANR     | TCGCTGGCTTATGATCCTCCTGTT    | CCGTTTGCCAAACTCAGCAAATTA  |

**Table S2:** HPLC analysis for the identification of the polyphenolic compounds in tree ripe (Stage 5) apple skin and cortex from ‘Hetlina’, ‘Devonshire Quarrenden’ and ‘Royal Gala’.

| Phenolic Compound (ug/g Fresh Frozen Tissue) | <i>Apple Sample</i> |                |                            |                              |                 |                   |
|----------------------------------------------|---------------------|----------------|----------------------------|------------------------------|-----------------|-------------------|
|                                              | Hetlina Skin        | Hetlina Cortex | Devonshire Quarrenden Skin | Devonshire Quarrenden Cortex | Royal Gala Skin | Royal Gala Cortex |
| Catechin                                     | 108                 | 29             | 154                        | 23                           | 123             | 22                |
| Procyanidin B1                               | 105                 | 26             | 227                        | 46                           | 82              | 32                |
| Epicatechin                                  | 1389                | 115            | 681                        | 77                           | 1049            | 87                |
| Procyanidin B2                               | 1164                | 98             | 334                        | 85                           | 499             | 75                |
| Total procyanidin Oligomers                  | 2616                | 158            | 619                        | 178                          | 1146            | 169               |
| Total procyanidin Polymers                   | 839                 | 479            | 292                        | 530                          | 428             | 210               |
| Chlorogenic Acid                             | 1152                | 732            | 663                        | 600                          | 157             | 160               |
| Total Hydroxycinnamic Acid Derivatives       | 121                 | 48             | 122                        | 41                           | 52              | 22                |
| Total Anthocyanins                           | 120                 | 0              | 143                        | 0                            | 167             | 0                 |
| Rutin                                        | 140                 | 0              | 98                         | 0                            | 115             | 0                 |
| Total Quercetin Derivatives                  | 5666                | 0              | 3966                       | 0                            | 3273            | 0                 |
| Phlorizin                                    | 196                 | 30             | 350                        | 22                           | 91              | 8                 |
| Total Dihydrochalcone Derivatives            | 134                 | 25             | 192                        | 13                           | 96              | 10                |

**Supplementary Figure S1:** Pie charts showing proportions of individual polyphenolic compounds that constitute the total polyphenolic amounts displayed in Figure 1b for (a) skin and (b) cortex for each cultivar; ‘Hetlina’, ‘Devonshire Quarrenden’ and ‘Royal Gala’.

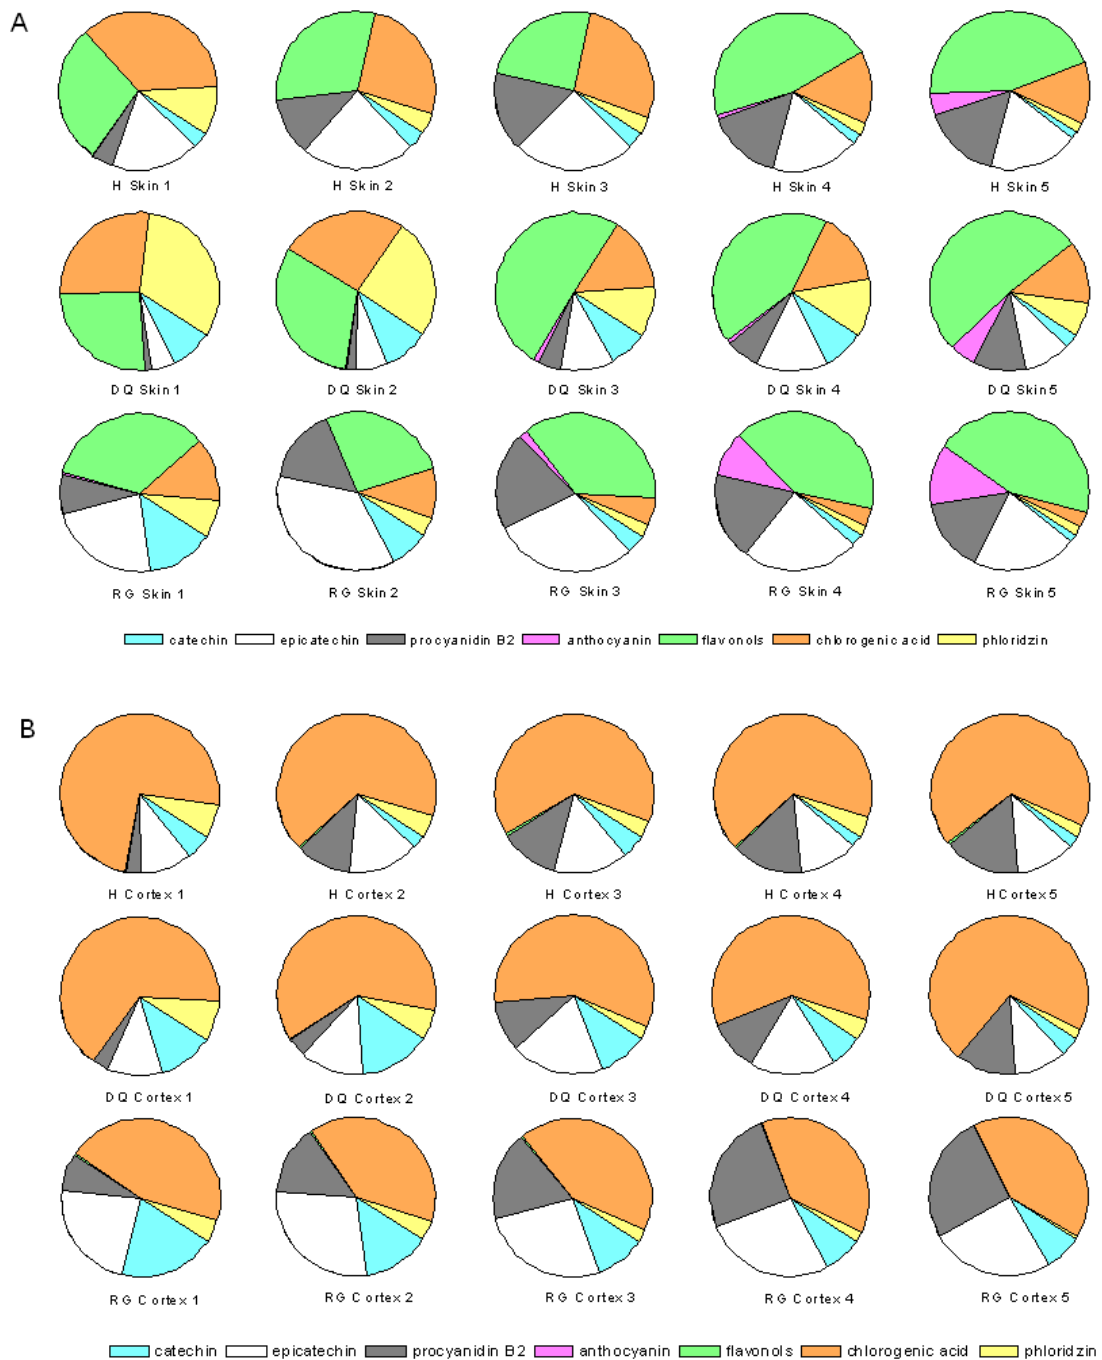

Supplement: supp_ers193_00077669_file001.pdf [file supp_ers193_00077669_file001.pdf]
